# Supplementary material
Source: PubMed Central journal article supplement (PMC1255988)

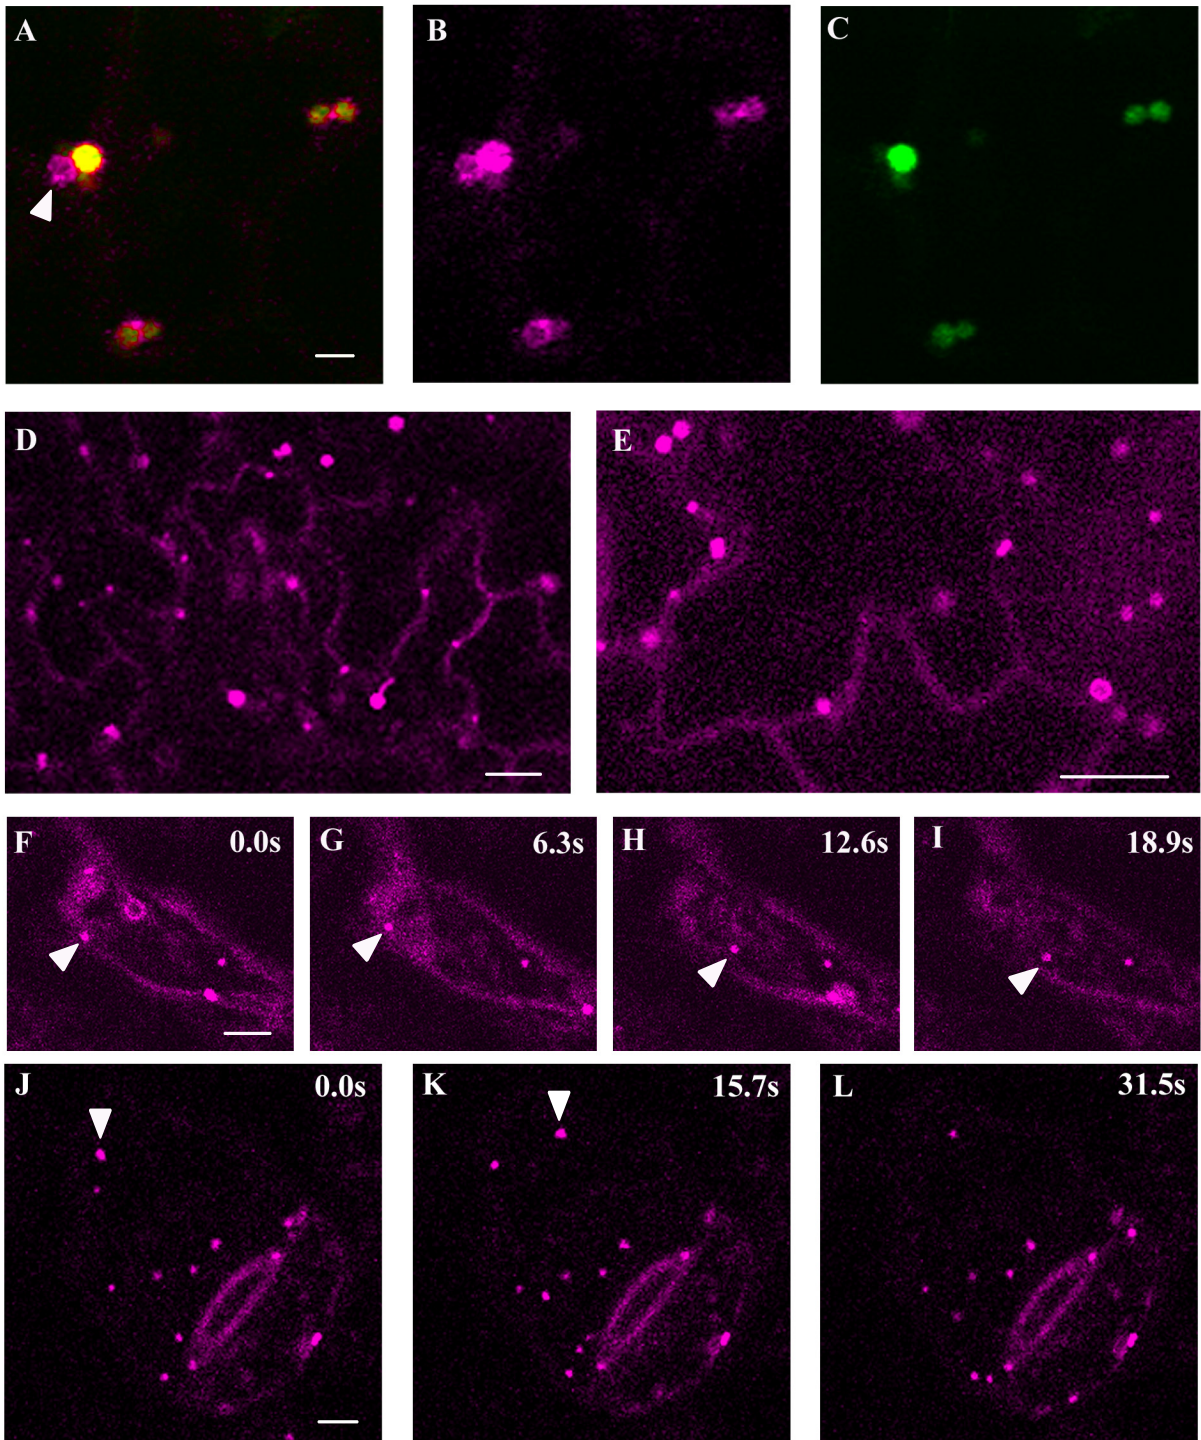

Supplemental figure 1

Supplement: plntphys_pp.105.065094_1.pdf [file plntphys_pp.105.065094_1.pdf]
